# Supplementary material for: Gender and Timing during Ontogeny Matter: Effects of a Temporary High Temperature on Survival, Body Size and Colouration in Harmonia axyridis
Source: PLoS One. 2013 Sep 25;8(9):e74984. doi: 10.1371/journal.pone.0074984 (PMC3783448; doi:10.1371/journal.pone.0074984)
Supplement: Figure S1 — The effect of period with elevated temperature during egg stage on survival rate. (DOC) [file pone.0074984.s001.doc]

**Figure S1**

**The effect of period with elevated temperature during egg stage on survival rate**


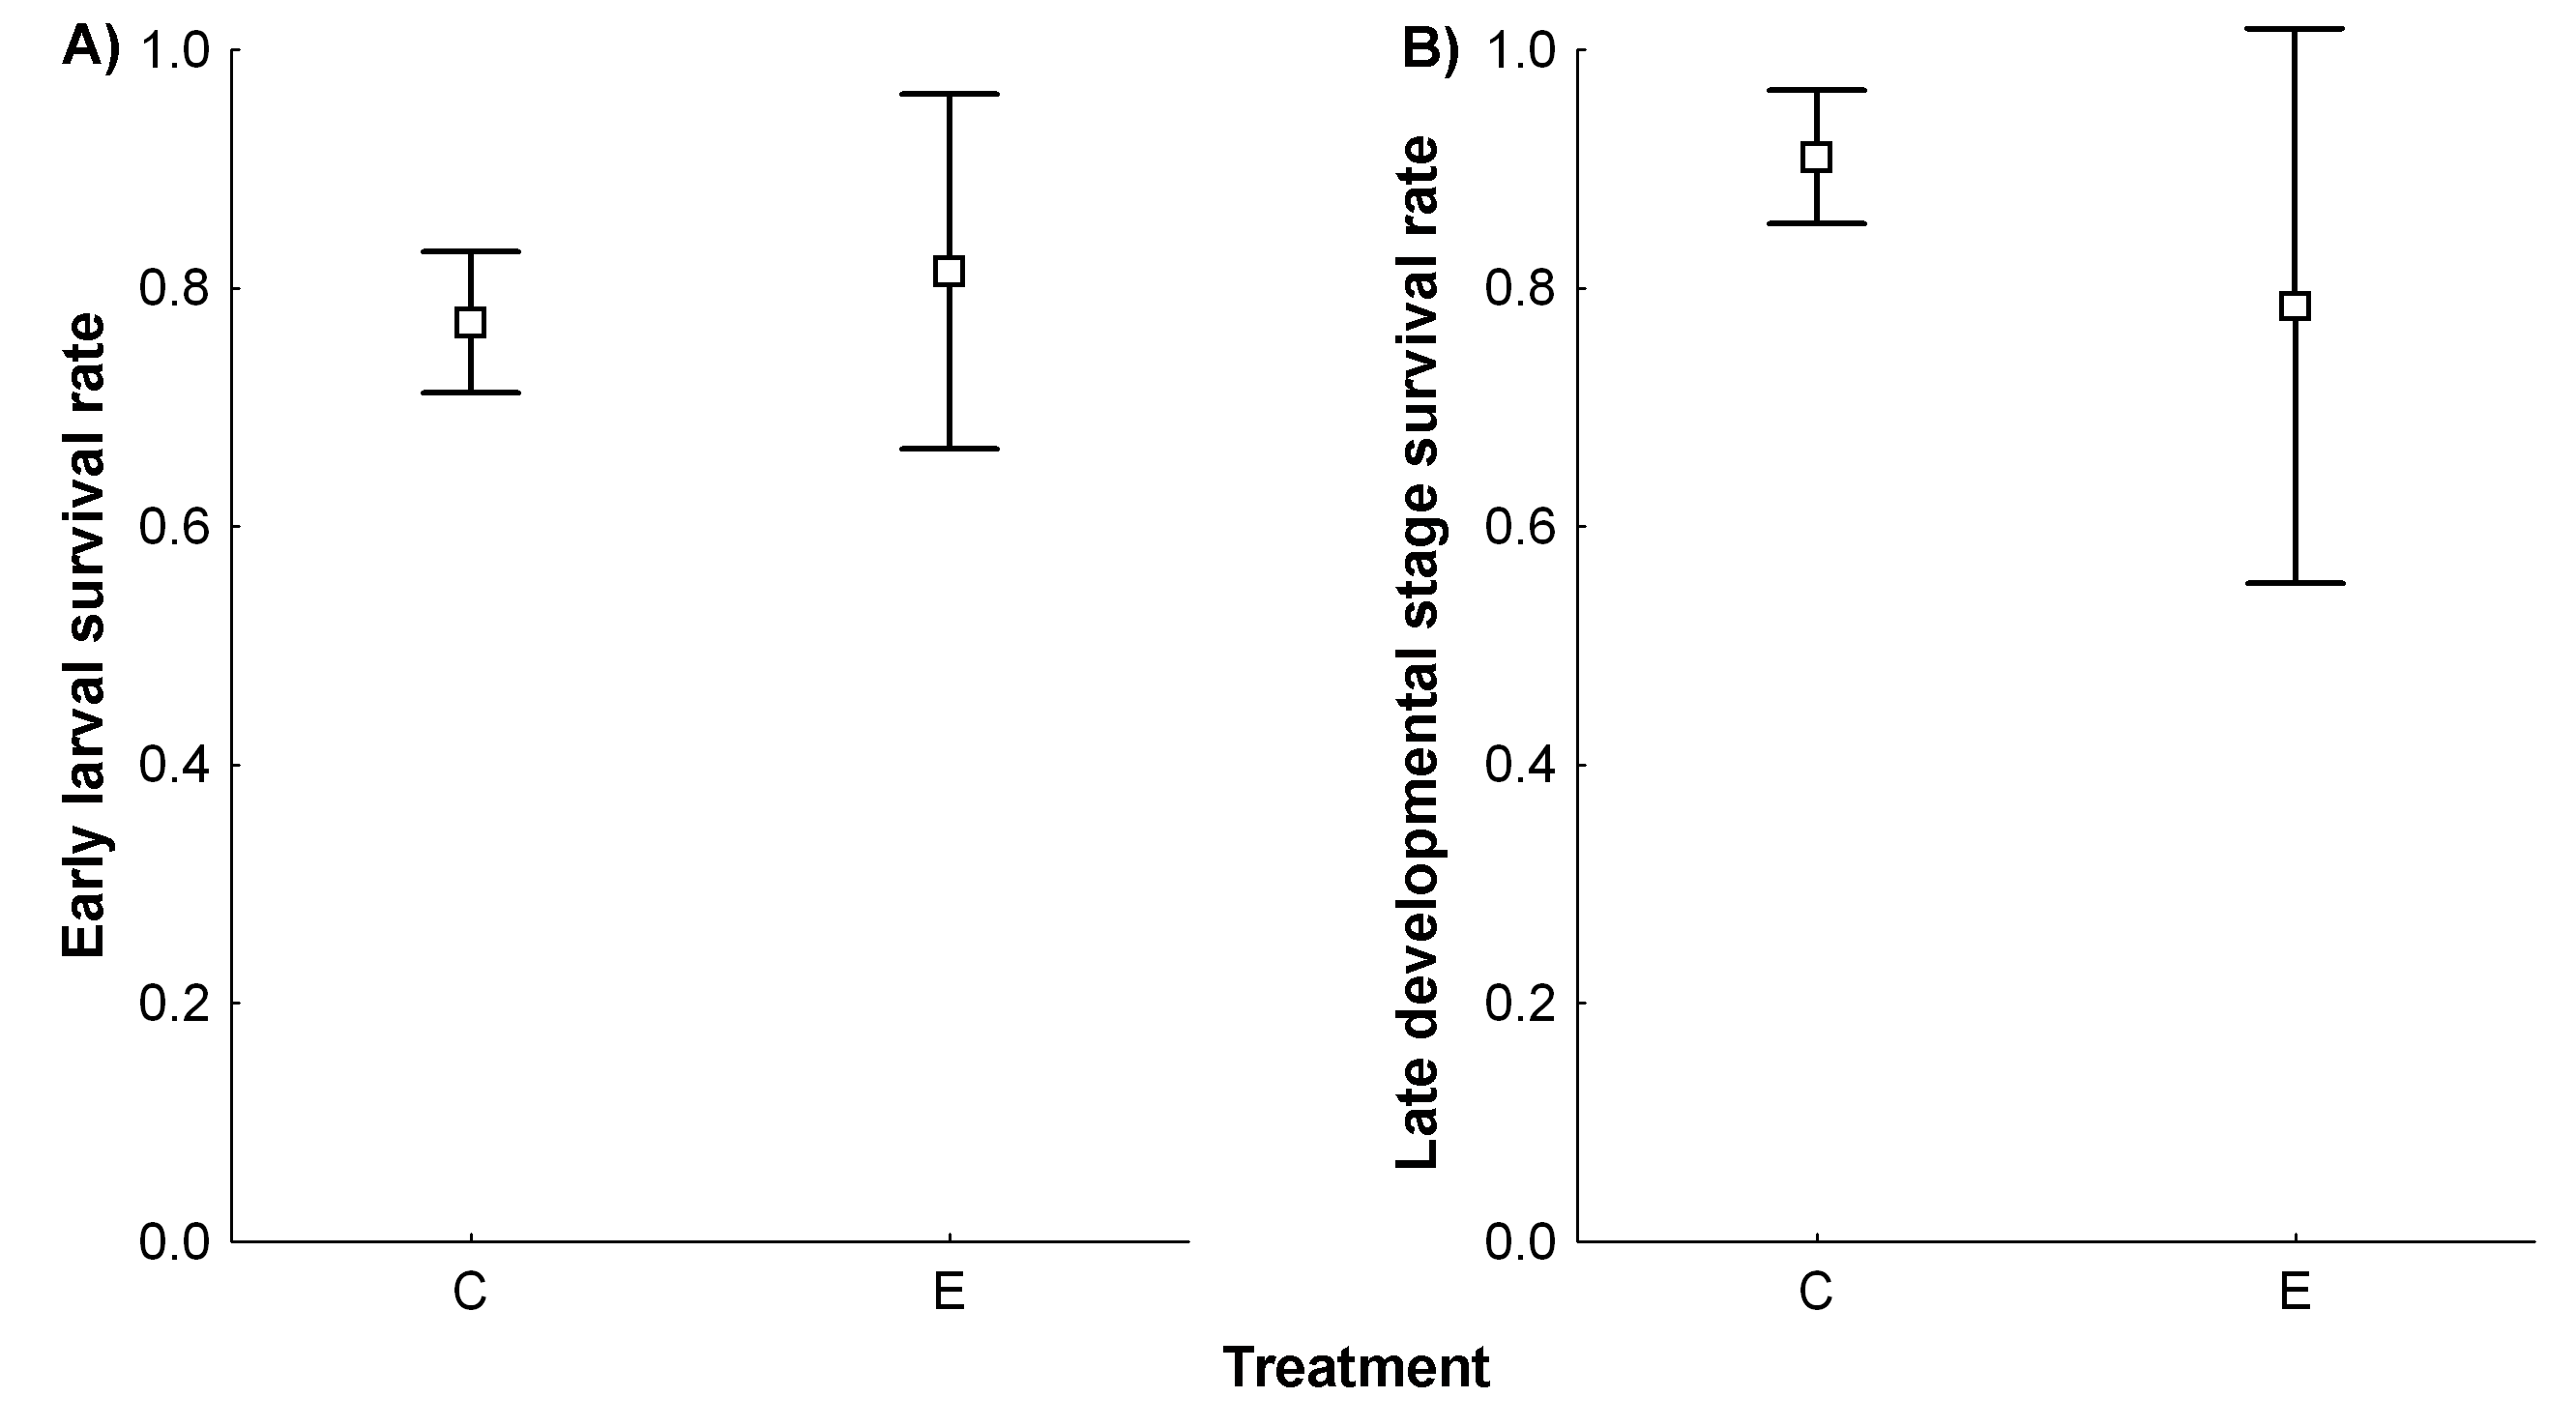


Survival rate of *Harmonia axyridis* was recorded for two stages. Early larval stage includes 1st and 2nd larval instars (panel **A**) whereas late developmental stage includes 3rd and 4th larval instars and pupa (panel **B**). Control individuals "C" were reared at constant temperature (20°C) and individuals from "E" treatment differed from control ones by exposition to a period of elevated temperature (48 hours at 33°C) during egg stage. Figure S1 and following analyses (see below) are based on limited dataset in comparison to results presented in result section of the paper, because for "E" treatment, 3rd instar larvae were obtained only for 9 families (parental pairs). Mean and ± 1.96 SE are shown. There were no significant differences in early larval survival rate (GLMM-binomial: F1,8 = 0.26, P = 0.63) nor in late developmental stage survival rate (GLMM-binomial: F1,8 = 2.61, P = 0.15) between control individuals and those experienced period with elevated temperature during egg stage.
